# Supplementary material for: Catalyst Design: Counter Anion Effect on Ni Nanocatalysts Anchored on Hollow Carbon Spheres
Source: MDPI journal article supplement (doi:10.3390/nano13030426), 2023-01-20
Supplement: s1 [file s1]

## Supplementary Information

### Catalyst design: Counter anion effect on Ni nanocatalysts anchored on hollow carbon spheres

Ryan O'Connor<sup>1, 2</sup>, Joyce B. Matsoso<sup>2, 3#</sup>, Victor Mashindi<sup>2</sup>, Pumza Mente<sup>2, 4§</sup>, Lebohang Macheli<sup>5</sup>, Beatriz D. Moreno<sup>6</sup>, Bryan P. Doyle<sup>5</sup>, Neil J. Coville<sup>1, 2\*</sup>, Dean Barrett<sup>1, 2\*</sup>

<sup>1</sup>DSI-NRF Centre of Excellence in Strong Materials and <sup>2</sup>Molecular Science Institute, School of Chemistry, University of the Witwatersrand, WITS 2050, Johannesburg, South Africa

<sup>3</sup> Department of Inorganic Chemistry, University of Chemistry and Technology in Prague, Dejvice 6, 166 28 Prague 6, Czech Republic#

<sup>4</sup>Institute of Physical Chemistry, Polish Academy of Science, Warsaw, Poland§

<sup>5</sup>Department of Physics, University of Johannesburg, P.O. Box 524, Auckland Park 2006, South Africa

<sup>6</sup>Canadian Light Source Inc., 44 Innovation Boulevard, Saskatoon, SK S7N 2V3, Canada

## Results

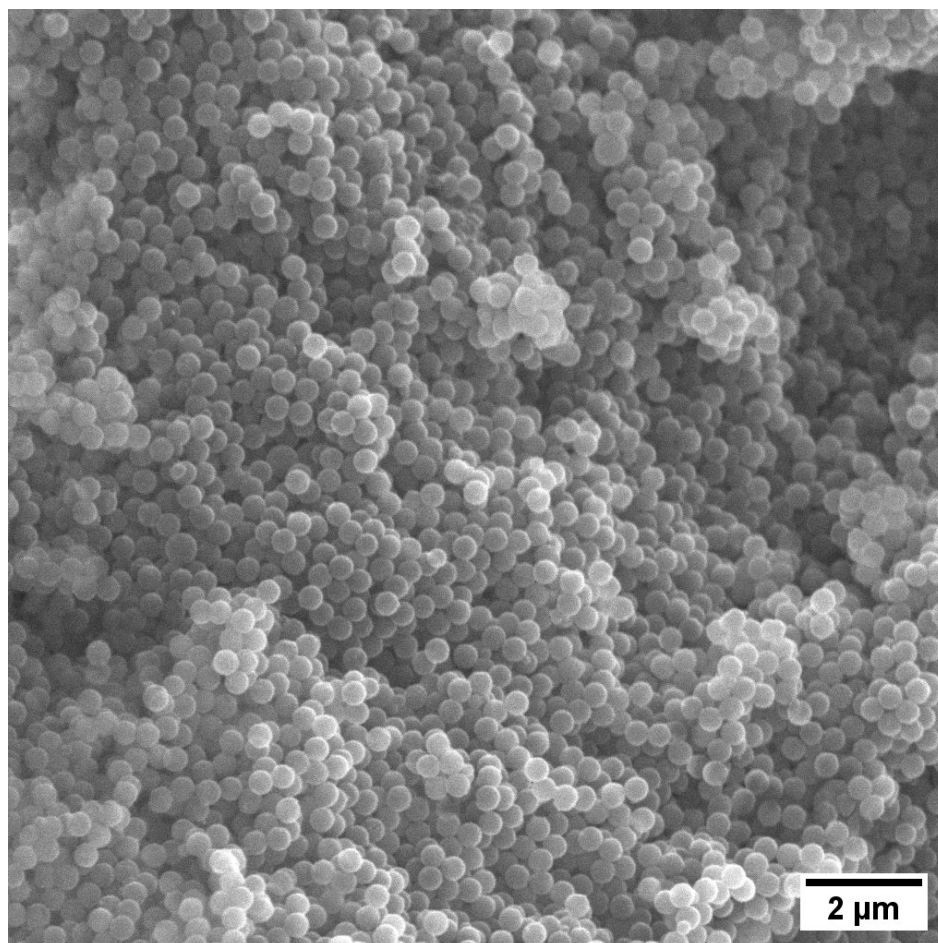

**Figure S1:** SEM micrographs of the PSS template.

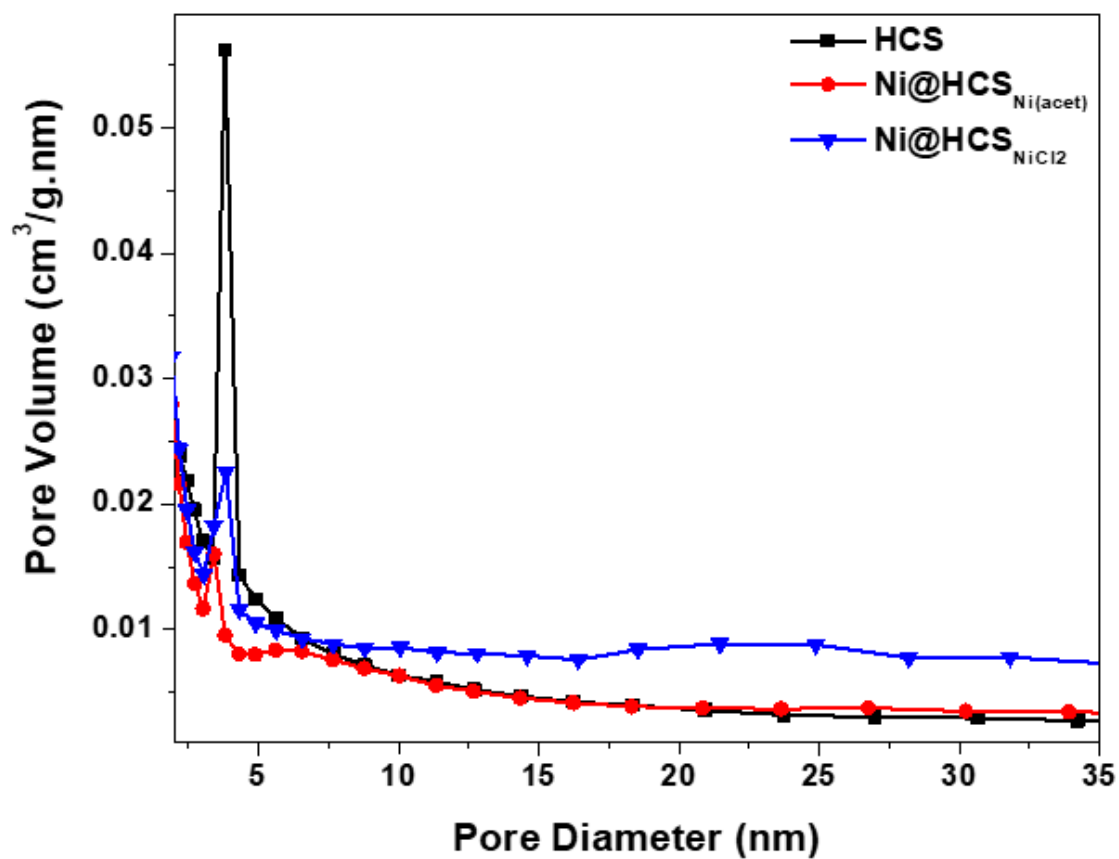

**Figure S2:** Pore size distributions of the pristine HCSs and Ni@HCSs nanocatalysts.

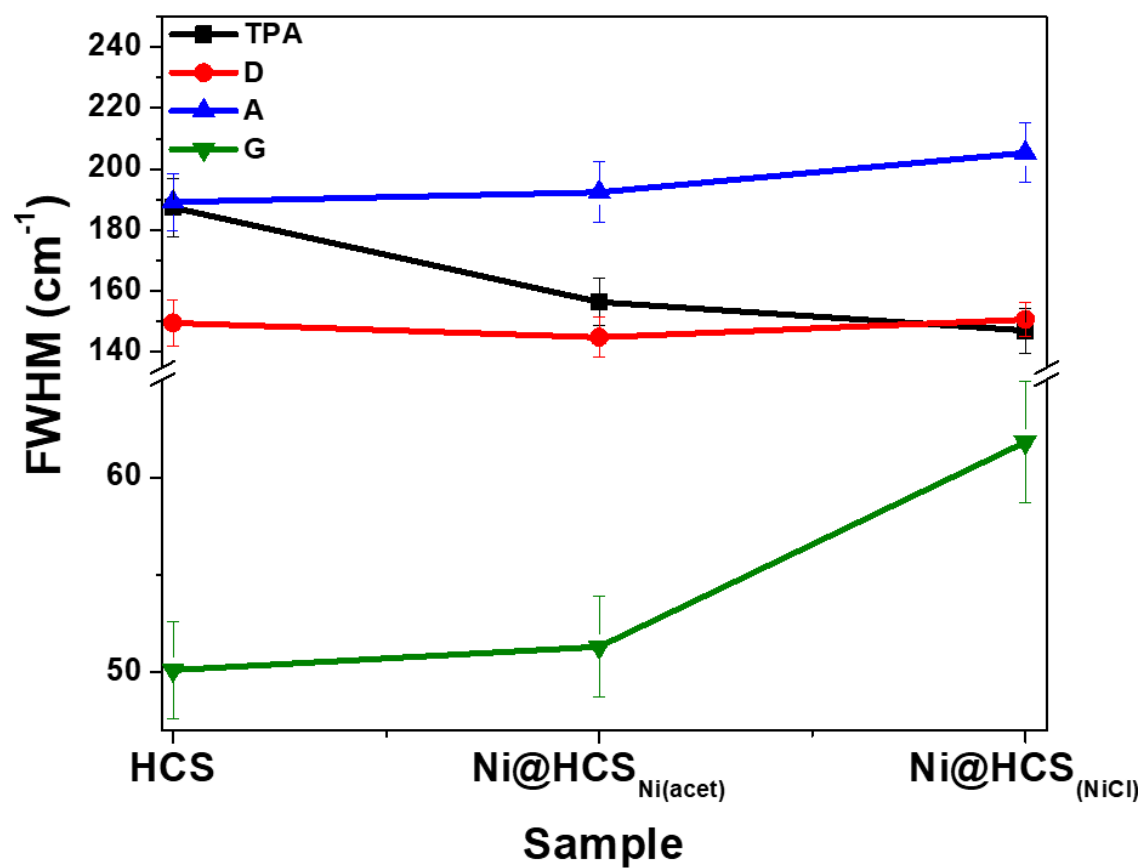

**Figure S3:** Peak broadening for all Raman-active bands for the pristine HCSs and nanocatalysts.

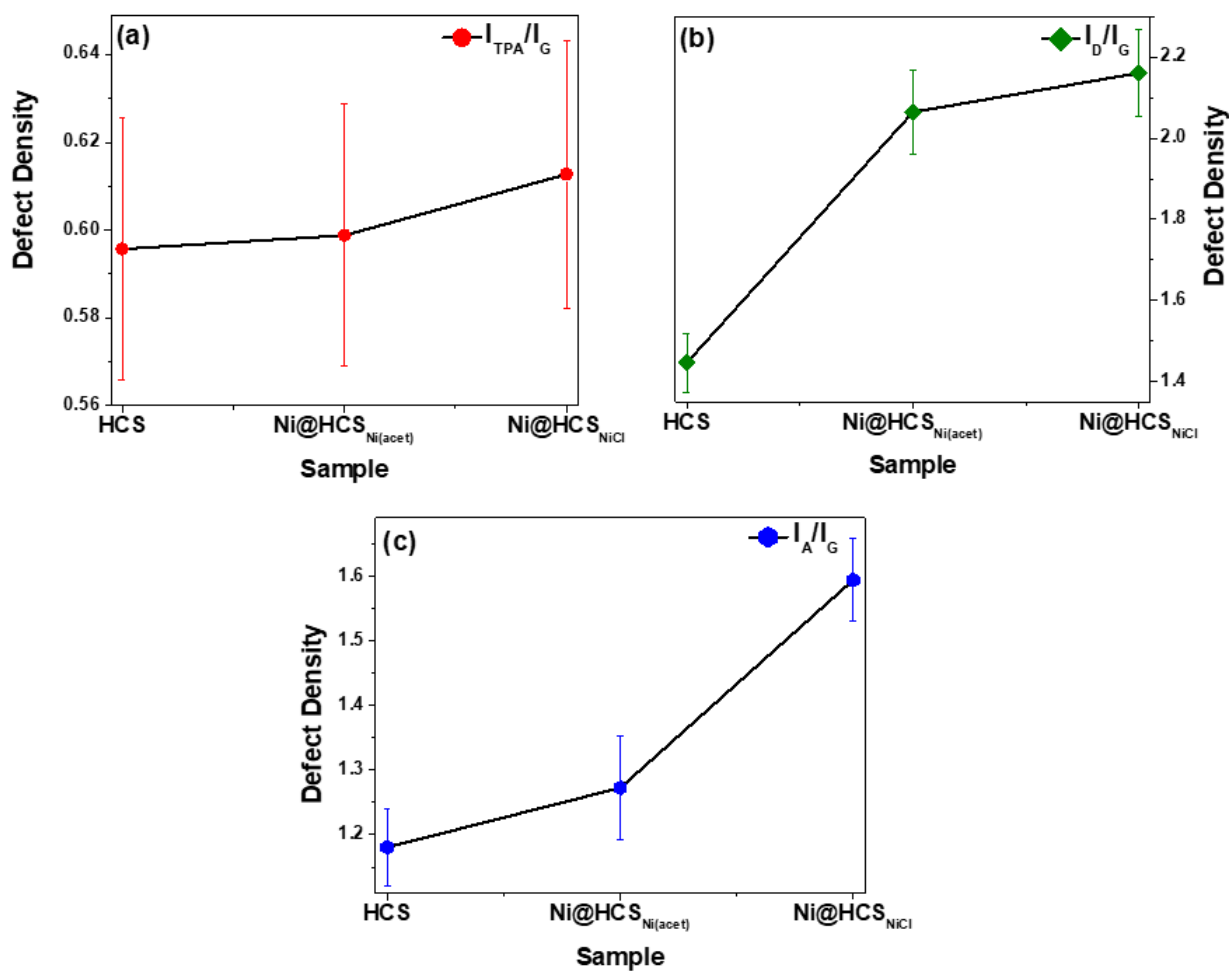

**Figure S4:** Defect density ratios (a)  $I_{TPA}/I_G$ , (b)  $I_D/I_G$  and (c)  $I_A/I_G$  of the pristine and Ni@HCSs samples.

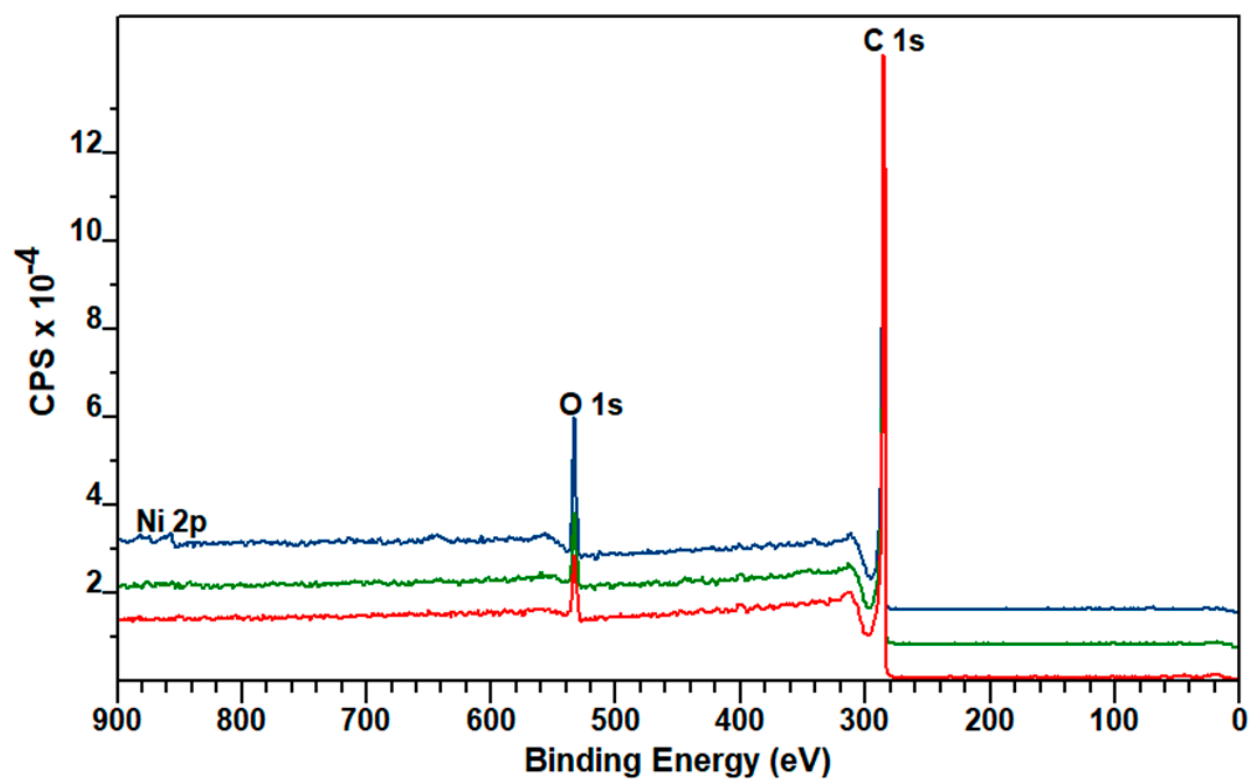

**Figure S5:** Survey XPS spectra of pristine HCSs (red), Ni@HCSsNi(acet)<sub>2</sub> (blue), and Ni@HCSsNiCl<sub>2</sub> (green) nanocatalysts

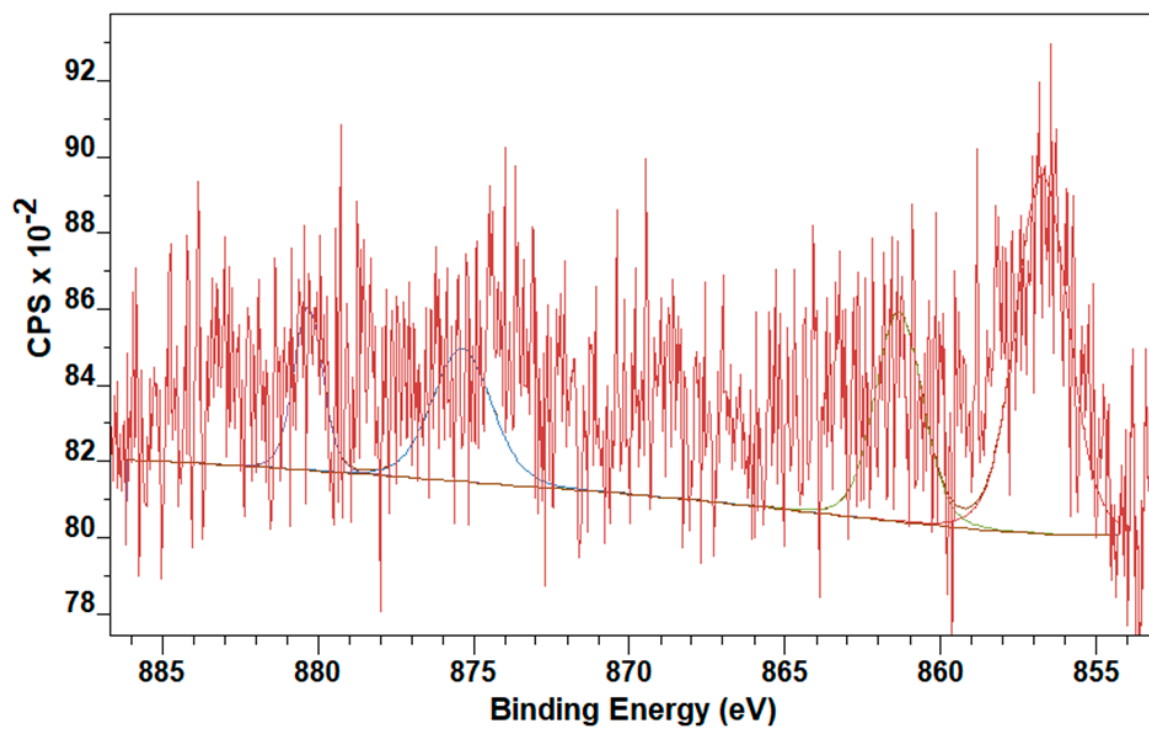

**Figure S6:** Deconvoluted Ni 2p spectrum of Ni@HCS<sub>NiCl2</sub> nanocatalysts.

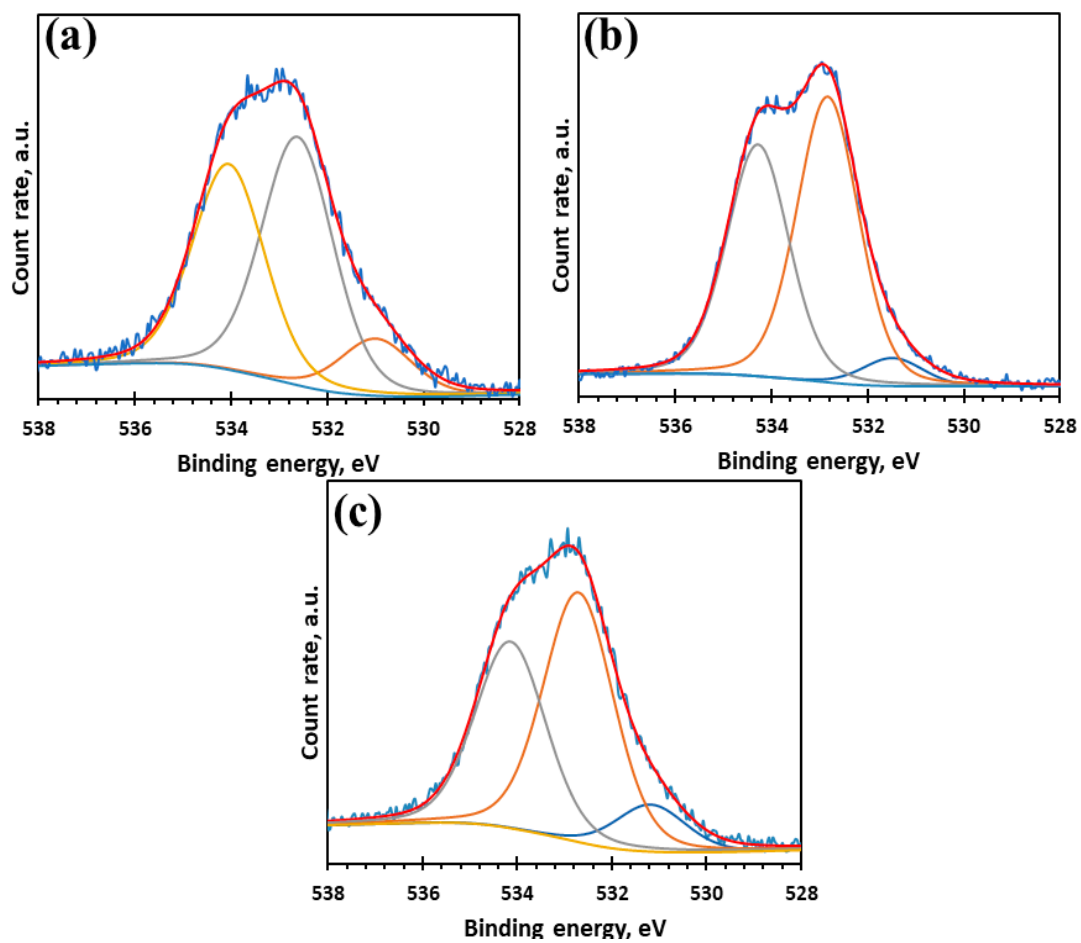

**Figure S7:** Deconvoluted O1s spectra of (a) pristine HCSs, (b) Ni@HCSsNi(acet)<sub>2</sub>, and (c) Ni@HCSsNiCl<sub>2</sub> nanocatalysts.

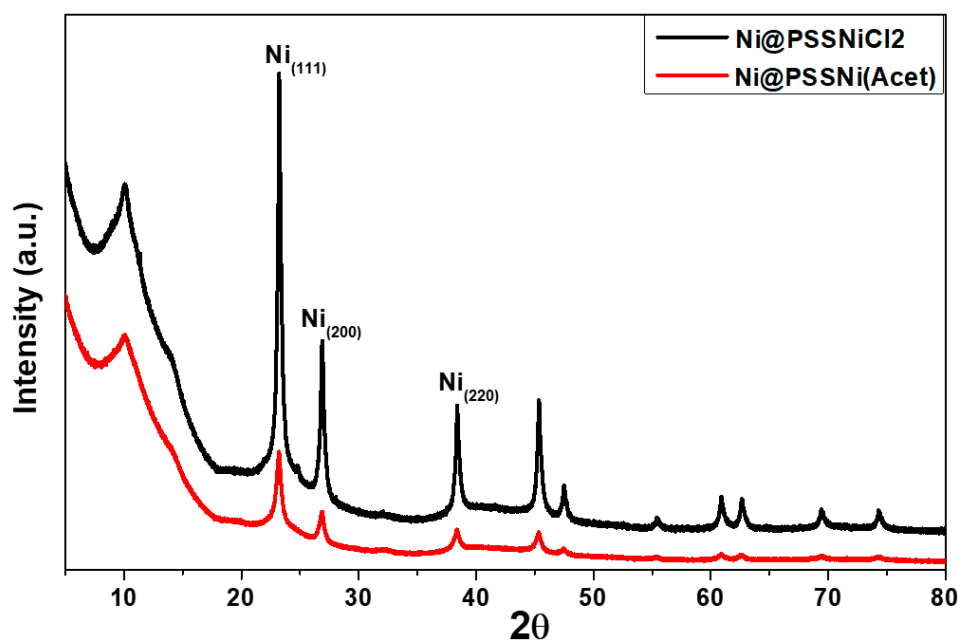

**Figure S8:** XRD patterns of the Ni nanoparticles on the PSS templates prior to RF coating.

**Table S1:** Morphological parameters based on TEM micrographs

| Sample                      | Size (nm) |          |          |                 |      |
|-----------------------------|-----------|----------|----------|-----------------|------|
|                             | Diameter  | Cavity   | Shell    | Ni nanoparticle |      |
|                             |           |          |          | TEM             | XRD  |
|                             |           |          |          |                 |      |
| HCSs                        | 342 ± 17  | 327 ± 16 | 10 ± 2.1 | -               | -    |
| Ni@HCSs <sub>NiCl2</sub>    | 332 ± 25  | 281 ± 21 | 23 ± 4.7 | 12 ± 1.9        | 10.9 |
| Ni@HCSs <sub>Ni(acet)</sub> | 326 ± 25  | 245 ± 19 | 42 ± 6.9 | 6.4 ± 1.2       | 8.6  |



**Table S2:** Thermal stability properties of pristine and Ni@HCSs samples

| <i>Sample</i>                     | <i>Onset Temp (°C)</i> | <i>Decomp. Temp. (°C)</i> |       |       | <i>% Residue</i> |
|-----------------------------------|------------------------|---------------------------|-------|-------|------------------|
|                                   |                        | (i)                       | (ii)  | (iii) |                  |
| <i>HCSs</i>                       | 568.1                  |                           | 642.7 |       | 0.76             |
| <i>Ni@HCSs<sub>Ni(acet)</sub></i> | 452.2                  | 489.3                     | 582.6 | 630.5 | 6.84             |
| <i>Ni@HCSs<sub>NiCl2</sub></i>    | 426.1                  | 484.5                     | 552.5 | 592.9 | 10.2             |
